# Supplementary material
Source: publisher site journal article supplement (https://www.dovepress.com/article/351771)
Supplement: Supplementary file 1 [file get_supplementary_file.php]

**Supplementary material**

**Figure S1**: Full questionnaire of general survey

1. **Gender**

- Male
- Female

1. **Age**

- <50
- 50-65
- >65

1. **Who do you live with?**

- Alone
- With partner
- Parents
- Son/s
- Cohabiting caregiver

1. **Personally, how worried are you about the ongoing health emergency in our country?**

- Not at all
- Little
- Enough
- A lot
- Very worried

1. **Reason for access to the Institute**

- Chemotherapy
- Standard Chemotherapy
- Experimental Chemotherapy
- Exams
- First visit
- Procedures
- Radiotherapy
- Surgery
- Gastroenterological hospitalization
- Onco-Hematological hospitalization
- Radiotherapy hospitalization
- Follow-up visit
- Follow-up visit and exams

1. **How do you judge the protection measures adopted in the Institute to limit the infection?**

- **Medical and nursing triage**
- Insufficient
- Decent
- Good
- Excellent
- **Use of personal protective equipment**
- Insufficient
- Decent
- Good
- Excellent
- **Hands sanitization**
- Insufficient
- Decent
- Good
- Excellent
- **Ensure proper physical distancing**
- Insufficient
- Decent
- Good
- Excellent
- **Swabs and isolation in case of suspected SARS-CoV-2 infection**
- Insufficient
- Decent
- Good
- Excellent
- **Sanitization of environments**
- Insufficient
- Decent
- Good
- Excellent
- **Availability of staff to provide information on the measures to be taken**
- Insufficient
- Decent
- Good
- Excellent

1. **Based on what you have observed, do doctors, nurses and health workers use protections?**

- Yes
- No
- Not always
- I do not know

1. **Based on what you have seen, do doctors, nurses and health care workers clean their hands often?**

- Yes
- No
- Not always
- I do not know

1. **Were you already equipped with personal protective equipment (mask, gloves, disinfectant gel) at the entrance to the institute?**

- Yes
- No

1. **If not, were they provided to you at the time of triage?**

- Yes
- No
- Partly

1. **Specify what was not available**
2. **What was your reaction to the measures put in place by the institute?**

- I felt more protected
- I felt more worried
- No reaction

1. **Did the measures implemented by the institute changed the quality of medical care?**

- The measures have improved the quality of medical care
- The measures have worsened the quality of medical care
- No changes to the quality of medical care
- No admission to the institute before March 2020

1. **Did the measures implemented by the institute changed the quality of nursing care?**

- The measures have improved the quality of nursing care
- The measures have worsened the quality of nursing care
- No changes to the quality of nursing care
- No admission to the institute before March 2020

1. **Do you think that the changes adopted by the institute have changed the way in which the healthcare staff related to you?**

- Yes, for the better
- Yes, for the worse
- No changes
- No admission to the institute before March 2020

1. **Have you received more contacts (telephone, e-mail) from the Institute in recent months than before March 2020?**

- Yes
- No

1. **If so, do you think they were useful?**

- Yes, a lot
- Enough
- No

1. **How do you evaluate the oncological evaluation performed in telemedicine (telephone/email) compared to a "face-to-face" visit?**

- Better
- Equal
- Worse

1. **Comments on the telemedicine evaluation**
2. **Did not being able to enter the Institute with your family member / caregiver caused you problems?**

- Yes
- No
- I do not know

1. **Comments on the absence of the family member / caregiver during the oncological evaluation**

**_____________________________________________________________________________**

1. **What are you most worried about right now?**

- Cancer
- Coronavirus (SARS-CoV-2)
- Other

1. **Have you had any family members infected with SARS-CoV-2**

- Yes
- No
- I do not know

1. **If so, how many?**

- 1
- 2
- 3
- 4
- >4

1. **In your opinion, after COVID-19 pandemic, some protection measures put in place by the Institute should remain?**

- Yes
- No

1. **If so, which ones?**
2. **Did you perceive the lack of volunteers following the suspension of activities for the COVID-19 emergency?**

- Yes
- No
- I do not know

1. **Comments on the lack of volunteers at the Institute during the COVID-19 emergency**

**_____________________________________________________________________________**
